# Supplementary material for: Dynamics of oil transfer in oil-in-water emulsions
Source: Royal Society of Chemistry journal article supplement (doi:10.1039/b912742a), 2009-01-01
Supplement: b912742a.pdf [file b912742a.pdf]

## Dynamics of oil transfer in oil-in-water emulsions

Nelly Bulgarelli<sup>a</sup> and Kathryn M. McGrath<sup>\*a</sup>

<sup>a</sup> MacDiarmid Institute for Advanced Materials and Nanotechnology, School of Chemical and Physical Sciences, Victoria University of Wellington, PO Box 600, Wellington, New Zealand. Fax: +64 4 463 5237; Tel: +64 4 463 5963; E-mail: [kathryn.mcgrath@vuw.ac.nz](mailto:kathryn.mcgrath@vuw.ac.nz)

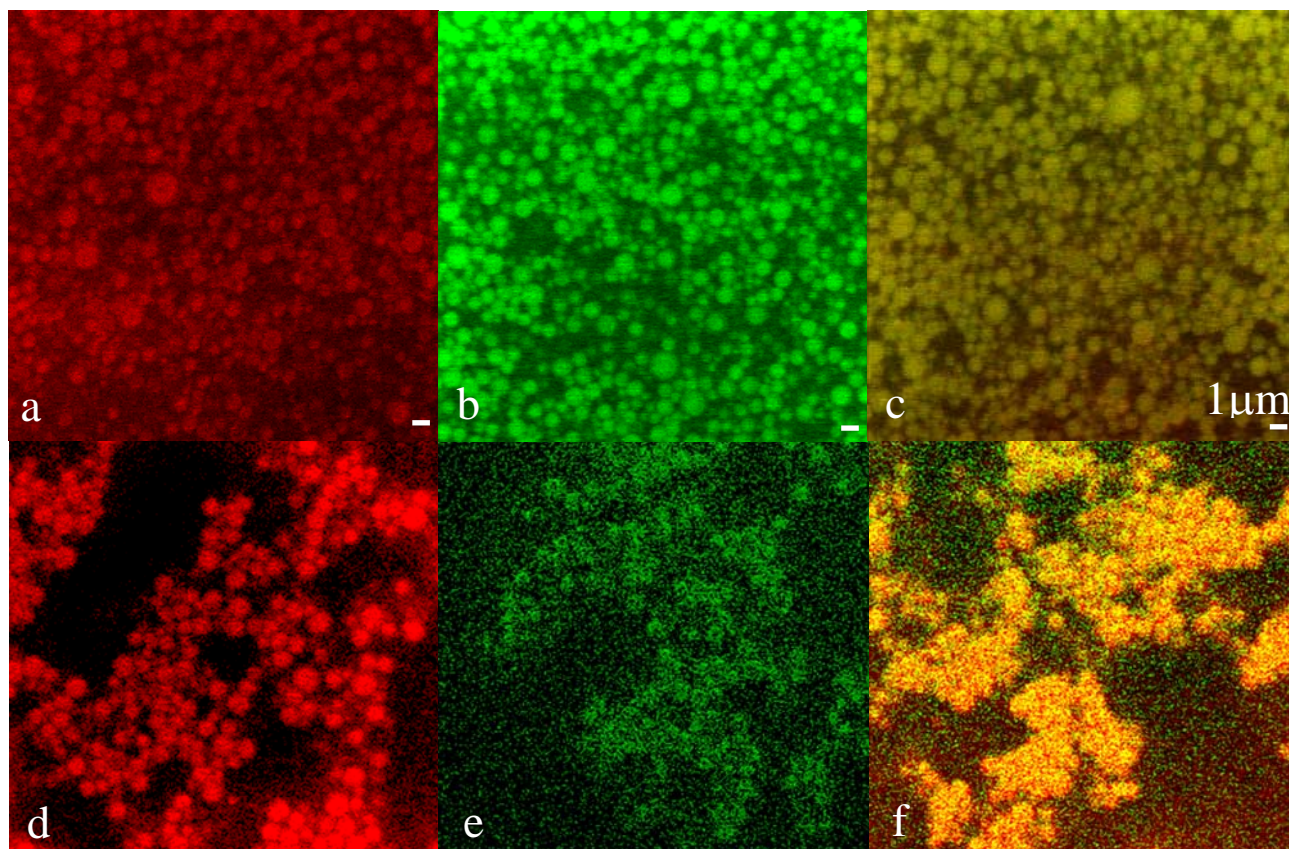

**Fig. ESI 1.** 2D confocal snapshots 256×256 (×100 objective) of emulsions freshly prepared with octane (8 wt%, a, b and c (mixture of emulsions a and b)) and *p*-xylene (13 wt%, d, e and f (mixture of emulsions d and e)). For octane emulsions the dyes were BODIPY 665/676 ((E,E)-3,5-bis-(4-phenyl-1,3-butadienyl)-4,4-difluoro-4-bora-3a,4a-diaza-s-indacene (red)) and BODIPY 493/503 (4,4-difluoro-1,3,5,7,8-pentamethyl-4-bora-3a,4a-diaza-s-indacene (green)) and for *p*-xylene emulsions Nile red (red) and 4-(4-methoxybenzylamino)-7-nitrobenzofurazan (green).

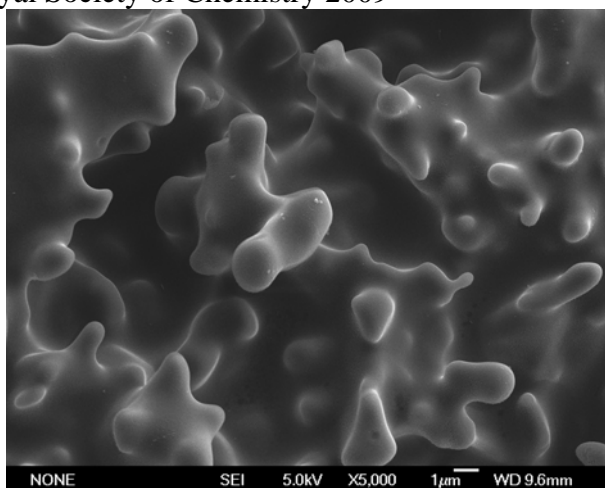

**Fig. ESI 2.** Cryo-SEM image of a freshly prepared 8 wt% toluene emulsion. While some interfacial features are still evident there are now pools of oil due to melting of the oil domains.
